1  
2  
3  
4  
5  
6  
7  
8  
9  
10  
11  
12  
13  
14  
15  
16  
17  
18  
19  
20  
21  
22  
23  
24  
25  
26  
27  
28  
29  
30  
31  
32  
33  
34  
35

Opposing effects of impulsivity and mindset on sources of science self-  
efficacy and STEM interest in adolescents

Marriott, L.K.<sup>1\*#a</sup>, Coppola, L.<sup>1#</sup>, Mitchell, S.H.<sup>2&</sup>, Bouwma-Gearhart, J.<sup>3&</sup>, Chen, Z.<sup>1#</sup>,  
Shifrer, D.<sup>4&</sup>, and Shannon, J.S.<sup>1#</sup>

<sup>1</sup> OHSU-PSU School of Public Health, Oregon Health & Science University, Portland, OR, United States of America

<sup>2</sup> Departments of Behavioral Neuroscience and Psychiatry, Oregon Health & Science University, Portland, OR, United States of America

<sup>3</sup> College of Education, Oregon State University, Corvallis, OR, United States of America

<sup>4</sup> Department of Sociology, Portland State University, Portland, OR, United States of America

<sup>#a</sup> Current Address: OHSU-PSU School of Public Health, Oregon Health & Science University, Portland, Oregon, United States of America

\*Corresponding Author:  
Lisa K. Marriott, PhD  
[marriott@ohsu.edu](mailto:marriott@ohsu.edu) (E-mail)

<sup>#</sup> These authors contributed equally to this work

<sup>&</sup> These authors also contributed equally to this work

## 36 **Abstract**

37 Impulsivity has been linked to academic performance in the context of Attention Deficit  
38 Hyperactivity Disorder, though its influence on a wider spectrum of students remains largely  
39 unexplored, particularly in the context of STEM learning (i.e. science, technology, engineering,  
40 and math). STEM learning was hypothesized to be more challenging for impulsive students,  
41 since it requires the practice and repetition of tasks as well as concerted attention to task  
42 performance. Impulsivity was assessed in a cross-sectional sample of 2,476 students in grades  
43 6-12. Results show impulsivity affects a larger population of students, not limited to students  
44 with learning disabilities. Impulsivity was associated with lower sources of science self-efficacy  
45 (SSSE) scores, interest in all STEM domains (particularly math), and self-reported STEM skills.  
46 The large negative effect observed for impulsivity was opposed by “growth” mindset, which  
47 describes a student’s belief in the importance of effort when learning is difficult. Mindset had a  
48 large positive effect, which was associated with greater SSSE, STEM interest, and STEM skills.  
49 When modeled together, results suggest that mindset interventions may benefit impulsive  
50 students who struggle with STEM. Together, these data suggest important interconnected roles  
51 for impulsivity and mindset that can influence secondary students’ STEM trajectories.  
52

## 53 **Introduction**

54 Students’ self-beliefs about their abilities in STEM (i.e. science, technology, engineering,  
55 and math) directly correlate with persistence in STEM fields (1, 2), even independent of parents’  
56 education or family income (3). The secondary school period is an important time for shaping  
57 students’ self-beliefs in STEM (3, 4) as well as for building STEM interest. While early interest  
58 in science is an important predictive factor for students later choosing a STEM-related career (5,  
59 6), it can be over-shadowed by poor academic performance in math and science courses,  
60 thereby altering a student’s self-belief in their ability to succeed in science (3). These self-  
61 beliefs are thought to contribute to student attrition from STEM fields (5, 7).

62 Spinella (8) previously reported impulsivity to be negatively associated with academic  
63 grades in college-aged students. Impulsivity describes “a predisposition toward rapid,  
64 unplanned reactions to internal or external stimuli without regard to the negative consequences  
65 of these reactions to the impulsive individuals or to others” (9). More operationally, impulsivity  
66 describes two different behavioral characteristics: 1) an impairment of behavioral inhibition; and  
67 2) a pronounced de-valuation of delayed outcomes (10, 11). Higher levels of impulsivity are

68 associated with various psychopathologies including certain ADHD subtypes, substance use  
69 disorder, conduct disorder, and delinquency (12-16). In contrast, low impulsivity levels have  
70 been associated with compulsivity, obsessive compulsive disorder, and some eating disorders  
71 (17, 18). Thus, all individuals would be expected to fall along a continuous scale of impulsivity.

72 Most impulsivity research investigating academic performance has focused on the  
73 contexts of attention-deficit/hyperactivity disorder (ADHD) (19, 20), risky behaviors (21, 22), and  
74 early childhood self-control/regulation (23, 24) leaving the role of impulsivity as an underlying  
75 behavioral trait that may shape students' academic performance largely unexplored (8, 25),  
76 particularly in the context of STEM learning. Impulsive students can have trouble staying on  
77 task and may be expected to find STEM learning more challenging, as academic effort in STEM  
78 involves practice and repetition of tasks as well as concerted attention to task performance.  
79 This may be especially true for mathematics, where content builds on prior knowledge and  
80 considerable repetitive practice is needed for mastery. For students, impulsivity may manifest  
81 as postponing homework or studying, which can contribute to poor academic performance. As  
82 students' self-beliefs in STEM formed during secondary school can be negatively influenced by  
83 poor academic performance (3), it is possible that impulsivity may influence these relationships.  
84 For example, children diagnosed with ADHD can have trouble in school with sustained  
85 attention, hyperactivity, and impulsivity, which can negatively affect learning outcomes (26).  
86 Students with ADHD attain lower academic levels than their peers (27), an effect also found for  
87 children who are severely inattentive, hyperactive, and impulsive, but lack a formal diagnosis of  
88 the disorder (20, 28, 29). In the United States, the prevalence of these disorders among  
89 children and adolescents range from 5.9%-7.1% for ADHD (30), 5-6% for learning disabilities  
90 (31), and 0.6-2.2% for autism spectrum disorder (32). However, sub-clinical levels of impulsivity  
91 may also affect students with or without learning disability classifications.

92 This study explored the prevalence of impulsivity in a large cross-sectional sample of  
93 secondary students, when interest in science is being shaped (5, 6), to understand whether sub-

94 clinical levels of impulsivity may affect a larger spectrum of students than previously considered.  
95 This study was not designed to be causal nor to identify learning disabilities among students,  
96 but rather to explore whether students' impulsivity levels were associated with early measures  
97 of STEM persistence, such as STEM interest, science self-efficacy, and self-beliefs toward  
98 science and learning.

99

## 100 **Materials and Methods**

### 101 **Participants and Settings**

102 A total of six schools were recruited to participate in the current study with procedures  
103 overseen by OHSU Institutional Review Board (IRB, (protocol #3694). Schools had a prior  
104 academic relationship with the investigator (L.K.M.) and were recruited based on school  
105 sociodemographics. Schools were offered \$500 USD for administering two anonymous surveys  
106 to their students during the 2014-2015 school year, with all sites accepting. Sites were  
107 distributed across three states (Oregon 1=two rural schools, 6-8th grades; Washington 2=one  
108 suburban school, 6<sup>th</sup>-8<sup>th</sup> grades; California 3=three urban schools, one 7<sup>th</sup>-8<sup>th</sup>, one 9-12<sup>th</sup>, and  
109 one 7<sup>th</sup>-12<sup>th</sup> grades) (35). All sites permitted use of their facilities, managed interaction with  
110 students, and oversaw parental opt-out forms that maintained student anonymity to study staff.

111

### 112 **Assessment Procedures**

113 Two paper-based surveys, approximately 30 minutes in length, were administered to  
114 students and separated by one month to lessen survey fatigue for students and class  
115 interruption time. To maintain anonymity while permitting the linkage of the two surveys,  
116 students were asked a series of questions on each survey to generate a unique identification  
117 number including a) first two letters of mother's first name (ID\_a), b) day of birth (ID\_b), c) last

118 two digits of phone number (ID\_c), and d) birth order (ID\_d). These responses, along with  
119 grade, gender, age, and teacher administering the survey, comprised the students' "unique ID"  
120 and was used to match the two surveys using a deterministic matching procedure (described  
121 below).

## 122 **Instruments**

123 Instruments included in Survey 1 included impulsivity, mindset, science self-efficacy, and  
124 STEM skills. Instruments included in Survey 2 assessed STEM domain interest, interest in a  
125 STEM career, and questions about learning behaviors.

- 126 • Barratt Impulsiveness Scale – short form (BIS-15) – The BIS-15 (36) comprised 15 items  
127 measured on a 4-point Likert scale (1-4, with six items reverse scored as previously reported  
128 (36, 37). Subscales (Attentional [A], Motor [M], and Non-Planning [NP]) previously produced  
129 Cronbach's alpha coefficients ( $\alpha$ ) between  $\alpha=.60-.78$  in university students. In the current  
130 study, a total of 2080 students completed all 15 items ( $\alpha=.75$ ), calculated from its three  
131 subscales, A ( $\alpha=.74$ ,  $n=2289$ ), M ( $\alpha=.61$ ,  $n=2282$ ), and NP ( $\alpha=.68$ ,  $n=2273$ ).
- 132 • Sources of Science Self-Efficacy –SSSE applied Usher and Parajes' validated mathematics  
133 scale (38) reworded for science (39). The instrument comprised 24 items that addressed  
134 four constructs: mastery experiences (ME), vicarious experiences (VE), social persuasion  
135 (P), and psychological and affective state (PH). Items were scored based on a 6-point Likert  
136 scale (0-5, scores from 0-120). Previous test reliability among 1225 middle and high school  
137 students produced  $\alpha=.87$ ,  $.71$ ,  $.85$ , and  $.86$  for the four constructs, respectively. In the  
138 current study, a total of 1899 students completed all 24 items ( $\alpha=.86$ ), representing a  
139 composite measure of SSSE calculated from ME ( $\alpha=.88$ ,  $n=2210$ ), VE ( $\alpha=.89$ ,  $n=2145$ ), P  
140 ( $\alpha=.91$ ,  $n=2086$ ), and PH ( $\alpha=.92$ ,  $n=2088$ ).

- 141 • Mindset – Mindset describes the continuum of a student’s felt beliefs of being able to  
142 increase personal intelligence through effort (termed “growth mindset”) versus it being a  
143 static trait conferred at birth (“fixed mindset”, 33, 34). A 20 item instrument designed by  
144 Dweck (33, 34) was scored on a 4-point Likert scale (1-4, with 10 items reverse-scored).  
145 Items stem from the Theory of Intelligence scale (33), Effort Belief Scale (40), and Patterns  
146 of Adaptive Learning Survey (41). Current analyses of 1759 students completing all 20 items  
147 produced  $\alpha=.75$ .
- 148 • STEM Skills – Four questions assessed self-reported skills related to using and interpreting  
149 data. Each question offered the stem “I am good at projects involving...” with responses of  
150 1) “using a website”; 2) “using data”; 3) “creating graphs”; and 4) “interpreting graphs”.  
151 Responses were scored on 5-point Likert scale ranging from Strongly Disagree to Strongly  
152 Agree. The current analyses of 2405 students completing the 4 items produced  $\alpha=.76$ .
- 153 • STEM Interest – A 25-item STEM Semantics survey assessed student perceptions and  
154 interest across five STEM domains: 1) science, 2) math, 3) engineering, 4) technology, and  
155 5) a STEM career (42, 43). Each domain included five questions that used adjective pairs to  
156 bookend a 7-point Likert scale, with a subset of items reverse scored. Domain scores were  
157 summed for each five question set. A composite STEM interest score was summed from all  
158 five subscales. Previous reliability among 174 students ranged from  $\alpha=.84-.93$ , with 1575  
159 students completing all 25 items in the current study ( $\alpha=.93$ ). The five subscales included  
160 science interest ( $\alpha=.89$ ,  $n=1807$ ), math interest ( $\alpha=.90$ ,  $n=1812$ ), engineering interest ( $\alpha=.90$ ,  
161  $n=1755$ ), technology interest ( $\alpha=.90$ ,  $n=1784$ ), and interest in a STEM career ( $\alpha=.92$ ,  
162  $n=1785$ ).
- 163 • STEM Learning – Four questions from the Index of Learning Styles (44) were used to  
164 triangulate findings, as they dichotomize students’ processes for solving mathematics  
165 problems and overall learning pace in the context of impulsivity. Selected questions  
166 included: 1) “When I am doing long calculations: a) I tend to repeat all my steps and check

167 my work carefully, or b) I find checking my work tiresome and I have to force myself to do it”;  
168 2) “When I solve math problems: a) I usually work my way to the solutions one step at a  
169 time, or b) I often just see the solutions but then have to struggle to figure out the steps to  
170 get to them”; 3) “I learn: a) at a fairly regular pace. If I study hard, I’ll “get it”, or b) in fits and  
171 starts. I’ll be totally confused and then suddenly it all “clicks””; and 4) “In a study group  
172 working on difficult material, I am more likely to a) jump in and contribute ideas, or b) sit  
173 back and listen”.

## 174 **Survey Processing and Statistical Analyses**

175 Paper surveys were scanned using Remark software that populated survey data into  
176 Excel for statistical analyses by SAS and SPSS. Survey data were first matched in SAS 9.4  
177 with subsequent analyses conducted with IBM SPSS Statistics, version 22. Geographical  
178 location and school demographics were obtained from 2013-2014 NCES data (35).

179  
180 Survey Linking Procedure. A deterministic matching procedure was used to first match all nine  
181 variables (school, gender, grade, ID\_a, ID\_b, ID\_c, age, teacher, and ID\_d) with matched  
182 records moved to a new dataset. The procedure was repeated down to five variables, with  
183 handwriting samples confirming matching at each level (n=31 total; 100% agreement). This  
184 procedure was used to link Survey 1 (n=2476) with Survey 2 (n=2115), representing a  
185 conservative match rate of 41.4% (n=875) of anonymous students. Analyses were conducted  
186 on all completed items; therefore, comparisons within a survey had larger sample sizes than  
187 between surveys.

188  
189 Statistical Analyses. Likert scale responses were converted numerically and summed for each  
190 subscale and composite score. Blank entries were not included in calculations. Non-parametric  
191 tests were first run on all comparisons (Mann Whitney U, Kruskal-Wallis H) due to controversy

192 with Likert scale data (45, 46); however, no outcome differences were observed between any  
193 metrics using non-parametric versus parametric analyses, therefore, parametric tests were used  
194 for reporting in the current study. Results apply independent sample t tests and ANOVA using  
195 mean and standard deviation (SD). Bonferroni post-hoc tests were used to determine  
196 differences between groups through multiple comparisons. Scales were first analyzed as  
197 continuous variables before being binned into quartiles to support data visualization (e.g.,  
198 impulsivity, mindset, SSSE, and math interest). Scale data were binned by quartile using SPSS  
199 and analyzed by general linear modeling to determine interactions between groups. Effect sizes  
200 are described using partial eta squared to account for comparisons across groups (47), with  
201 established benchmarks defining small (partial  $\eta^2 = 0.01$ ), medium (partial  $\eta^2 = 0.06$ ), and large  
202 (partial  $\eta^2 = 0.14$ ) effects (47, 48). Confidence intervals were calculated using SPSS syntax  
203 developed by Karl Wuensch (49). Finally, hierarchical linear modeling was used to account for  
204 the fact that multiple students from the same school may be more similar in responses than  
205 students at other schools. Specifically, the linear mixed model function in SPSS was used to  
206 account for parameter estimates of impulsivity, mindset, grade, gender and school on SSSE as  
207 fixed factors. Chi square tests were used to determine dichotomous differences in STEM  
208 learning across student quartiles. Graphs reflect mean $\pm$ SEM, or percentages for chi square  
209 results.

210

211 Missing Data Procedures. To control for missing data, since impulsive students may be more  
212 likely to skip questions or scales, survey responses were analyzed by student demographics  
213 (gender and grade) within and between survey time points. Instrument scores were compared  
214 by completion status and demographics to understand if scores differed for students who  
215 completed all scales versus a subset of scales.



## 216 **Results**

### 217 **Participants**

218 A total of 3234 students were enrolled across the six sites (NCES 2015) and had the  
219 opportunity to complete survey measures, with 2476 completing Survey 1 and 2115 completing  
220 Survey 2. Fig 1 describes inclusion criteria and instrument sample sizes for analyses across the  
221 two survey time points. Of the 2476 students in grades 6-12 completed Survey 1, 85.8% were  
222 middle school students in U.S. grades 6-8 (Table 1). Participants were 47% female, consistent  
223 with NCES data for these participating schools (47.7% female; 58.7% qualify for free or reduced  
224 lunch). Racial/ethnic demographics of students were not collected in this study, though NCES  
225 data describe that 33.4% qualified as underrepresented minorities (URM) in STEM (50),  
226 denoting students who identified as African American (9.5%), Hispanic or Latino (22.6%), or  
227 Native American/Alaskan Native (1.3%). Students identifying as “Two or More Races”  
228 represent an additional 6.8% of the student population. Survey 2 was completed by a similar  
229 number of students, with chi square showing similar distributions in gender ( $p=.66$ ) but not  
230 grade ( $p<0.001$ ), as less 7<sup>th</sup> grade students and more high school students participated in  
231 Survey 2 (Table 1).

232

233 **Fig 1.** Inclusion criteria and sample sizes for analyses.

234

235

236 **Table 1.** Participant Demographics

|               | <b>Overall School Demographics</b><br>NCES Data<br>(n=3234) | <b>Survey 1</b><br>(n=2476)<br><i>Mindset, Impulsivity, Science Self-Efficacy, STEM Skills</i> | <b>Survey 2</b><br>(n=2115)<br><i>STEM Interest, Learning Behaviors</i> |
|---------------|-------------------------------------------------------------|------------------------------------------------------------------------------------------------|-------------------------------------------------------------------------|
| <b>Gender</b> |                                                             |                                                                                                |                                                                         |
| Female        | 1543 (47.7%)                                                | 1132 (46.9%)                                                                                   | 972 (46.8%)                                                             |
| Male          | 1691 (52.3%)                                                | 1281 (53.1%)                                                                                   | 1103 (53.2%)                                                            |
|               |                                                             | n=2413                                                                                         | N=2075                                                                  |
| <b>Grade</b>  |                                                             |                                                                                                |                                                                         |
| 6             | 493 (15.2%)                                                 | 449 (18.6%)                                                                                    | 422 (20.4%)                                                             |
| 7             | 1089 (33.7%)                                                | 1011 (42.0%)                                                                                   | 658 (31.9%)                                                             |
| 8             | 1109 (34.3%)                                                | 607 (25.2%)                                                                                    | 597 (28.9%)                                                             |
| 9             | 157 (4.9%)                                                  | 136 (5.6%)                                                                                     | 132 (6.4%)                                                              |
| 10            | 153 (4.7%)                                                  | 87 (3.6%)                                                                                      | 116 (5.6%)                                                              |
| 11            | 106 (3.3%)                                                  | 92 (3.8%)                                                                                      | 83 (4.0%)                                                               |
| 12            | 127 (3.9%)                                                  | 26 (1.1%)                                                                                      | 56 (2.7%)                                                               |
|               |                                                             | n=2408                                                                                         | n=2064                                                                  |

237

## 238 Behavioral Measures

### 239 Impulsivity

240 A total of 2080 students completed the impulsivity scale (mean=33.2, SD=6.7; Table 2).  
 241 Quartiles denote scores of ≤ 28 (least impulsive); 29–33, 34–37, and 38+ (most impulsive),  
 242 which were used to investigate relationships between mindset and STEM metrics (STEM  
 243 interest and science self-efficacy). No differences in impulsivity subscales were observed for  
 244 gender (subscale data not shown). Grade had a small effect on impulsivity ( $p < 0.005$ ; partial  $\eta^2 =$   
 245 0.01), with similar effects observed for both M ( $p < 0.001$ , partial  $\eta^2 = 0.013$ ) and A ( $p < 0.005$ ;  
 246 partial  $\eta^2 = 0.016$ ) subscales. Specifically, 9<sup>th</sup> graders had highest impulsivity as well as motor  
 247 and attentional subscale scores, though differences were only significant when compared to 6<sup>th</sup>  
 248 grade students ( $p < 0.05$ ).

249

250

**Table 2.** Means and effect sizes of impulsivity, mindset, SSSE, and STEM domain interest across gender and grade.

|                       | Impulsivity                                            | Mindset                                                | SSSE                                                    | Science Interest                                         | Math Interest                                            | Engineering Interest                                    | Technology Interest                                     | Interest in a STEM Career                               | Interest in STEM Domains (Cumulative Score)              |
|-----------------------|--------------------------------------------------------|--------------------------------------------------------|---------------------------------------------------------|----------------------------------------------------------|----------------------------------------------------------|---------------------------------------------------------|---------------------------------------------------------|---------------------------------------------------------|----------------------------------------------------------|
| Overall Mean + SD (n) | 33.2, 6.7, n=2080                                      | 60.0, 7.3, n=1759                                      | 67.4, 22.6, n=1899                                      | 24.2, 7.9 (n=1807)                                       | 21.8, 8.8 (n=1812)                                       | 22.6, 8.8 (n=1755)                                      | 25.3, 8.2 (n=1784)                                      | 24.0, 8.5 (n=1785)                                      | 94.1, 24.2 (n=1575)                                      |
| Gender                | $t(2028)=1.20$ , $p=0.23$<br>partial $\eta^2=0.001$    | $t(1723)=-1.99$ , $p<0.05$<br>partial $\eta^2=0.002$   | $t(1856)=2.69$ , $p=0.007$<br>partial $\eta^2=0.004$    | $t(1773)=2.76$ , $p<0.007$<br>partial $\eta^2=0.004$     | $t(1781)=2.37$ , $p<0.02$<br>partial $\eta^2=0.003$      | $t(1727)=12.05$ , $p<0.001$<br>partial $\eta^2=0.078$   | $t(1754)=8.88$ , $p<0.001$<br>partial $\eta^2=0.043$    | $t(1756)=5.8$ , $p<0.001$<br>partial $\eta^2=0.019$     | $t(1773)=2.76$ , $p<0.007$<br>partial $\eta^2=0.049$     |
| Male                  | 33.3, 6.4, n=1090                                      | 59.7, 7.5, n=896                                       | 68.8, 21.9, n=967                                       | 24.7, 7.8, n=939                                         | 22.3, 8.6, n=945                                         | 24.9, 8.4, n=918                                        | 26.9, 8.0, n=928                                        | 25.2, 8.4, n=926                                        | 99.1, 23.7, n=825                                        |
| Female                | 32.9, 6.8, n=940                                       | 60.4, 7.0, n=829                                       | 66.6, 23.3, n=891                                       | 23.7, 8.0, n=836                                         | 21.26, 9.0, n=838                                        | 20.0, 8.6, n=811                                        | 23.5, 8.0, n=828                                        | 22.8, 8.5, n=832                                        | 88.3, 23.6, n=726                                        |
| Grade                 | $F(6, 2022)=3.32$ , $p<0.004$<br>partial $\eta^2=0.01$ | $F(6, 1719)=2.47$ , $p<0.03$<br>partial $\eta^2=0.009$ | $F(6, 1850)=7.31$ , $p<0.001$<br>partial $\eta^2=0.023$ | $F(6, 2148)=11.56$ , $p<0.001$<br>partial $\eta^2=0.022$ | $F(6, 2086)=10.36$ , $p<0.001$<br>partial $\eta^2=0.029$ | $F(6, 2040)=3.76$ , $p<0.001$<br>partial $\eta^2=0.018$ | $F(6, 2034)=4.24$ , $p<0.001$<br>partial $\eta^2=0.019$ | $F(6, 1863)=7.93$ , $p<0.001$<br>partial $\eta^2=0.038$ | $F(6, 2148)=11.56$ , $p<0.001$<br>partial $\eta^2=0.031$ |
| 6                     | 32.0, 6.6, n=371 <sup>b</sup>                          | 61.3, 6.8, n=218 <sup>c</sup>                          | 71.3, 23.1, n=268 <sup>a</sup>                          | 25.5, 7.5, n=352 <sup>a</sup>                            | 24.1, 8.8, n=355 <sup>a</sup>                            | 23.4, 8.3, n=329 <sup>a</sup>                           | 26.5, 7.9, n=341 <sup>a</sup>                           | 26.4, 7.8, n=347 <sup>a</sup>                           | 98.4, 23.0, n=303 <sup>a</sup>                           |
| 7                     | 33.1, 6.3, n=847                                       | 59.9, 7.2, n=771                                       | 66.4, 21.7, n=797 <sup>bnz</sup>                        | 24.1, 7.7, n=552 <sup>a</sup>                            | 21.8, 8.5, n=556 <sup>y</sup>                            | 23.2, 9.0, n=543 <sup>a</sup>                           | 25.9, 8.2, n=542 <sup>bz</sup>                          | 24.3, 8.5, n=547 <sup>bz</sup>                          | 95.5, 23.2, n=479 <sup>a</sup>                           |
| 8                     | 33.3, 7.0, n=514                                       | 60, 7.4, n=464                                         | 70.4, 22.5, n=498 <sup>a</sup>                          | 24.4, 8.1, n=516 <sup>a</sup>                            | 21.8, 8.5, n=517 <sup>y</sup>                            | 22.5, 8.8, n=505 <sup>b</sup>                           | 24.7, 8.4, n=519                                        | 24.1, 8.2, n=513 <sup>bx</sup>                          | 93.9, 24.5, n=448 <sup>a</sup>                           |
| 9                     | 34.6, 6.8, n=115 <sup>y</sup>                          | 58.5, 7.1, n=111 <sup>z</sup>                          | 58.3, 24.0, n=119 <sup>mx</sup>                         | 20.4, 8.3, n=117                                         | 20.3, 8.9, n=118 <sup>x</sup>                            | 19.2, 9.1, n=117                                        | 22.7, 8.0, n=116                                        | 21.0, 8.7, n=115 <sup>x</sup>                           | 82.8, 25.0, n=106                                        |
| 10                    | 34.3, 6.1, n=77                                        | 59, 7.2, n=68                                          | 64.0, 25.0, n=71                                        | 24.9, 7.3, n=101 <sup>a</sup>                            | 20.2, 9.2, n=98 <sup>x</sup>                             | 23.5, 8.6, n=100 <sup>b</sup>                           | 26.7, 7.5, n=99 <sup>b</sup>                            | 23.5, 9.5, n=102 <sup>c</sup>                           | 95.9, 25.1, n=91 <sup>b</sup>                            |
| 11                    | 33.6, 7.2, n=83                                        | 60.5, 8, n=76                                          | 66.1, 23.9, n=81                                        | 23.5, 7.7, n=72                                          | 18.2, 8.8, n=72 <sup>x</sup>                             | 21.1, 7.8, n=66                                         | 24.4, 7.3, n=73                                         | 20.8, 7.7, n=72 <sup>x</sup>                            | 87.1, 23.0, n=60 <sup>z</sup>                            |
| 12                    | 34.1, 6.1, n=22                                        | 58.4, 7.3, n=18                                        | 57.9, 17.0, n=23                                        | 23.5, 8.8, n=51                                          | 18.4, 9.4, n=51 <sup>x</sup>                             | 20.0, 8.7, n=52                                         | 22.9, 8.2, n=50                                         | 19.6, 9.2, n=51 <sup>x</sup>                            | 84.5, 25.5, n=48 <sup>y</sup>                            |

Results shown as Mean, SD, and sample size of analysis. Effect size benchmarks define small (partial  $\eta^2= 0.01$ ), medium (partial  $\eta^2= 0.06$ ), and large (partial  $\eta^2= 0.14$ ) effects. Bonferroni post-hoc tests were used to determine differences between groups through multiple comparisons. For grade, <sup>a</sup> denotes differences between 9<sup>th</sup> grade students at the  $p<0.001$ , <sup>b</sup>  $p<0.01$ , and <sup>c</sup>  $p<0.05$  levels whereas <sup>x</sup> denotes differences between 6<sup>th</sup> grade students at the  $p<0.001$ , <sup>y</sup>  $p<0.01$ , and <sup>z</sup>  $p<0.01$  levels.

## Mindset

A total of 1759 students completed the mindset instrument (mean=60.0, SD=7.3). Mindset quartiles reflect scores of  $\leq 55$  (lowest mindset, referred to in the literature as “fixed” mindset), 56 – 60, 61 – 65, to 66+ (highest mindset, “growth” mindset). Mindset scores were higher among females than males ( $p < 0.05$ , Table 2), though the effect size was very small (partial  $\eta^2 = 0.002$ ). A small but significant difference was observed across grade ( $p < 0.03$ ; partial  $\eta^2 = 0.009$ ), relating to lower mindset scores among 9<sup>th</sup> grade students compared to 6<sup>th</sup> graders.

## Sources of Science Self-Efficacy (SSSE)

A total of 1912 students (mean=68.0, SD=22.6, Table 2) completed the SSSE scale with quartiles reflecting scores of  $\leq 52$ , 53–67, 68–84, and 85+. SSSE scores were higher among males than females ( $p < 0.001$ ), though only the physiological state (PH) subscale differed between gender ( $p < 0.001$ ; partial  $\eta^2 = 0.013$ ), with males having higher sub-scores than females (subscale data not shown). As PH items are reverse-scored, lower numbers denote a higher physiological response. Grade had a small effect on SSSE ( $p < 0.001$ , partial  $\eta^2 = 0.023$ ) with Bonferroni post-hoc tests showing lower SSSE and ME sub-scores among 9<sup>th</sup> graders compared to students in 6-8<sup>th</sup> grade ( $p < 0.002$ ).

## STEM Skills

A composite STEM skills score was calculated for 2405 students (mean=14.5, SD=3.1) from four questions (mean, SD, n) that asked about self-reported skills using a website (4.0, 0.9, n=2417), using data (3.7, 1.0, n=2411), creating graphs (3.5, 1.1, n=2412), and interpreting graphs (3.3, 1.1, n=2408). Females had significantly lower scores than males on all questions

and the composite score ( $p < 0.001$ ; partial  $\eta^2 = 0.01$ ) though no differences were found between grades ( $p = 0.35$ ).

## Interest in STEM Domains and Career Interest

Interest in all four STEM domains were quantified for 1575 students using Survey 2 responses (Table 2). STEM domain scores differed significantly between males and females (all  $p < 0.02$ ), with males having higher scores in each category. Effect sizes for gender ranged from small to medium and all STEM domains differed significantly by grade (Table 2,  $p < 0.001$ ), with small to small-medium effect sizes observed. Bonferroni tests showed 9<sup>th</sup> graders had significantly lower interest across all domains.

## Impulsivity and Mindset have Opposing Effects on Sources of Science Self-Efficacy

Pearson product-moment correlations were first used to determine relationships between impulsivity, mindset, and sources of science self-efficacy among students in grades 6-12, with results consistent across all school sites and grades. Impulsivity was negatively associated with SSSE ( $r = -.43$ ,  $n = 1663$ ,  $p < 0.001$ ), whereas mindset was positively associated ( $r = .40$ ,  $n = 1580$ ,  $p < 0.001$ ). A series of two-way ANOVAs were conducted by general linear modeling (GLM) to examine the relationship between impulsivity and mindset quartiles on SSSE. Students in the least impulsive quartile ( $\leq 28$ ) had highest mean SSSE scores ( $79.5 \pm 21.8$ ), with SSSE scores declining significantly with each impulsivity quartile (Fig 2A;  $71.0 \pm 20.6$ ,  $64.3 \pm 19.1$ ,  $53.7 \pm 21.8$ ), resulting in a large effect size ( $F_{(3, 1662)} = 114.11$ ,  $p < 0.001$ ,  $\eta^2_p = 0.171$ , 90% CI [0.144, 0.196]). Post-hoc tests revealed SSSE scores differed between each impulsivity quartile. The significant effects of impulsivity on SSSE persisted when controlling for

each M, A, and NP subscale scores (all  $p < 0.001$ ). Likewise, the effect was consistent across grade and no interaction was observed among 1673 students ( $p = 0.85$ ).

**Fig 2. Sources of science self-efficacy scores were influenced by impulsivity**

(A; large negative effect size;  $p < 0.001$ ; partial  $\eta^2 = 0.171$ ) and mindset (B; large positive effect size,  $p < 0.001$ ; partial  $\eta^2 = 0.170$ ). When modeled together (C), mindset opposed impulsivity's negative stepwise effects on SSSE. Students with most impulsivity (red bars) yet highest mindset had equivalent science self-efficacy scores to students with least impulsivity yet lowest mindset.

Mindset positively associated with SSSE ( $n = 1580$ ,  $p < 0.001$ ), resulting in a large effect size ( $F_{(3, 1579)} = 105.7$ ,  $p < 0.001$ ,  $\eta^2_p = 0.167$ , 90% CI [0.142, 0.196], Table 3). Mindset quartiles differed significantly, with students in the highest mindset quartile (66+) having higher mean SSSE scores ( $80.8 \pm 19.4$ ) than students in lower mindset quartiles (Fig 2B;  $70.8 \pm 22.0$ ,  $64.2 \pm 19.9$ , and  $55.5 \pm 21.2$ ). Grade affected mindset ( $p < 0.001$ ; partial  $\eta^2 = 0.009$ ), where 9<sup>th</sup> grade students had lower mindset scores than 6<sup>th</sup>, 7<sup>th</sup>, and 8<sup>th</sup> grade students (all  $p < 0.01$ ), though no interaction was observed between mindset quartile and grade on SSSE ( $p = .79$ ).

**Table 3.** Effect Sizes and correlation coefficients of impulsivity and mindset on STEM metrics,

| Metrics                          | Lowest Quartile (Mean, SD, n) | Highest Quartile (Mean, SD, n) | SS       | Df, n   | MS      | F      | Sig (p) | Effect Size (Partial $\eta^2$ ) | 90% CI       | r                |
|----------------------------------|-------------------------------|--------------------------------|----------|---------|---------|--------|---------|---------------------------------|--------------|------------------|
| <b>Impulsivity on:</b>           |                               |                                |          |         |         |        |         |                                 |              |                  |
| Sources of Science Self-Efficacy | 79.5, 21.8, 432               | 53.7, 20.6, 406                | 149257.8 | 3, 1662 | 49752.6 | 114.11 | .000    | .171                            | 0.144, 0.196 | -.43             |
| Composite STEM Domains Score     | 101.9, 23.2, 149              | 81.9, 22.3, 131                | 28372.6  | 3, 566  | 9457.5  | 18.71  | .000    | .091                            | 0.053, 0.126 | -.32             |
| Composite STEM Skills            | 15.6, 2.9, 521                | 14.4, 3.1, 2064                | 1542.8   | 3, 2064 | 514.3   | 57.9   | .000    | .078                            | 0.059, 0.096 | -.31             |
| Mathematics Interest             | 25.0, 8.5, 164                | 18.9, 8.1, 149                 | 3156.8   | 3, 642  | 1052.3  | 14.47  | .000    | .064                            | 0.034, 0.093 | -.29             |
| Science Interest                 | 25.9, 7.6, 165                | 21.2, 7.6, 150                 | 1919.0   | 3, 647  | 639.3   | 10.82  | .000    | .048                            | 0.022, 0.074 | -.24             |
| Interest in a STEM Career        | 25.7, 8.2, 164                | 21.6, 8.4, 144                 | 1414.41  | 3, 630  | 471.5   | 6.68   | .000    | .031                            | 0.01, 0.053  | -.18             |
| Engineering Interest             | 24.2, 8.1, 161                | 19.9, 8.7, 145                 | 1390.9   | 3, 624  | 463.6   | 6.42   | .000    | .030                            | 0.009, 0.052 | -.19             |
| Technology Interest              | 26.7, 7.5, 164                | 22.8, 8.7, 144                 | 1273.0   | 3, 631  | 424.3   | 6.34   | .000    | .029                            | 0.009, 0.051 | -.16             |
| <b>Mindset on:</b>               |                               |                                |          |         |         |        |         |                                 |              |                  |
| Sources of Science Self-Efficacy | 56.2, 21.4, 422               | 81.7, 19.3, 381                | 138994.5 | 3, 1588 | 46331.5 | 108.19 | .000    | .170                            | 0.142, 0.196 | .41              |
| Composite STEM Domains Score     | 85.8, 22.0, 117               | 103.2, 22.3, 118               | 18905.7  | 3, 472  | 6301.9  | 12.30  | .000    | .073                            | 0.036, 0.108 | .25              |
| Science Interest                 | 21.6, 7.6, 139                | 26.8, 8.0, 134                 | 1932.6   | 3, 530  | 644.2   | 10.71  | .000    | .058                            | 0.026, 0.088 | .23              |
| Composite STEM Skills            | 13.8, 3.6, 483                | 15.6, 2.9, 413                 | 761.3    | 3, 1750 | 253.8   | 26.6   | .000    | .044                            | 0.028, 0.059 | .22              |
| Interest in a STEM Career        | 22.3, 8.1, 130                | 26.2, 8.4, 129                 | 1478.5   | 3, 518  | 492.8   | 6.87   | .000    | .039                            | 0.013, 0.065 | .17              |
| Technology Interest              | 23.3, 8.8, 131                | 27.6, 6.8, 131                 | 1299.8   | 3, 520  | 433.3   | 6.79   | .000    | .038                            | 0.012, 0.064 | .18              |
| Mathematics Interest             | 20.7, 8.8, 137                | 24.0, 9.0, 130                 | 908.2    | 3, 528  | 302.7   | 3.97   | .008    | .022                            | 0.003, 0.043 | .15              |
| Engineering Interest             | 21.1, 8.9, 130                | 24.1, 8.4, 128                 | 739.5    | 3, 513  | 246.5   | 3.19   | .024    | .018                            | 0.001, 0.037 | .11 <sup>a</sup> |

Items ranked by quartile effect size (partial  $\eta^2$ ) for both impulsivity and mindset using established benchmarks to define small (partial  $\eta^2$ = 0.01), medium (partial  $\eta^2$  = 0.06), and large (partial  $\eta^2$ = 0.14) effects (47, 48).

The combined effect of mindset and impulsivity on SSSE was examined by two-way ANOVA among 1405 students. Significant, stepwise effects in opposing directions were observed for both impulsivity and mindset quartiles on SSSE (all  $p < 0.001$ ; Fig 2C). Thus, mean SSSE scores for students in the most impulsive quartile/highest mindset quartile ( $70.8 \pm 2.9$ ; 95% CI=65.2-76.5) were equivalent to students in the least impulsive/lowest mindset quartile ( $68.7 \pm 2.8$  SE; 95% CI 63.3-74.1). These patterns were consistent within each middle school grade (6th-8th), which comprised >85% of the sample, and were reproducible for high school when collapsing grades 9-12, which comprised a smaller sample size. No interaction was observed between mindset and impulsivity on SSSE ( $p = 0.71$ ). Table 4 describes parameter estimates for SSSE using hierarchical linear modeling.

**Table 4. Linear mixed model estimates for the fixed effects of impulsivity and mindset on sources of science self-efficacy.**

| Parameters                   | Estimate | Standard Error | df   | t     | Significance (p) | 95% Confidence Interval |
|------------------------------|----------|----------------|------|-------|------------------|-------------------------|
| Intercept                    | 287.225  | 76.381         | 1349 | 3.76  | .000             | 137.39, 437.06          |
| Grade                        | -25.839  | 9.658          | 1349 | -2.68 | .008             | -44.79, -6.89           |
| Impulsivity                  | -2.298   | 0.614          | 1349 | -3.74 | .000             | -3.50, -1.09            |
| Mindset                      | -2.401   | 1.183          | 1349 | -2.03 | .043             | -4.72, -0.08            |
| School                       | -0.784   | 0.324          | 1349 | -2.42 | .016             | -1.42, -0.15            |
| Gender                       | -3.409   | 5.438          | 1349 | -0.63 | .531             | -14.08, 7.26            |
| Gender * Impulsivity         | -4.136   | 1.381          | 1349 | -2.99 | .003             | -6.85, -1.43            |
| Grade * Mindset              | 0.374    | 0.151          | 1349 | 2.47  | .013             | 0.08, 0.67              |
| Grade * Impulsivity          | 0.142    | 0.072          | 1349 | 1.98  | .047             | 0.00, 0.28              |
| Gender * Grade * Impulsivity | 0.452    | 0.175          | 1349 | 2.59  | .010             | 0.11, 0.80              |

Schwarz's Bayesian Criterion (BIC) score was 11936.8 and coefficients of variation were 33.8% (SSSE), 12.0% (Mindset), 20.0% (Impulsivity), 16.7% (grade), 33.8% (gender), and 51.8% (school).

## STEM Interest is positively associated with SSSE

Moderate, positive correlations were observed between science interest and SSSE ( $r = .48$ ) and a large effect was observed ( $p < 0.001$ ,  $n = 586$ , partial  $\eta^2 = 0.197$ ). Interest in all STEM domains correlated with SSSE (all  $p < 0.001$ ), with strongest associations and largest



effect sizes observed for composite STEM domain interest ( $r=.43$ ,  $n=518$ ,  $p<0.001$ , partial  $\eta^2=0.171$ ) and STEM career interest ( $r=.32$ ,  $n=583$ ,  $p<0.001$ , partial  $\eta^2=0.103$ ). Small-medium effect sizes were observed for all other STEM domain quartiles on SSSE (partial  $\eta^2=0.037-0.064$ ). A series of two-way ANOVAs were conducted by hierarchical linear modeling to examine the relationship between mindset and impulsivity quartiles on each STEM interest domain (all  $p<0.001$ ), with small to medium effect sizes observed for each measure (**Table 3**).

## **SSSE is positively associated with students' beliefs in their STEM skills**

GLM revealed a large effect size of SSSE quartiles on STEM skills ( $F_{(3, 1888)} = 108.9$ ,  $p<0.001$ ,  $\eta^2_p = 0.148$ , 90% CI [0.123, 0.171]), where students in the lowest SSSE quartile had significantly lower STEM skill scores (mean=12.9, SD=3.3,  $n=474$ ) than students in the highest SSSE quartile (mean=16.2, SD=2.6,  $n=450$ ). Both impulsivity and mindset influenced STEM skills (partial  $\eta^2 = .078$  and  $.044$ , respectively; Table 3), particularly graph interpretation, which had the lowest mean of all four questions.

## **Effect of Gender on the Relationship between STEM metrics**

Females had lower scores than males in composite STEM interest ( $F(6, 1516)=2.3$ ,  $p<0.04$ , partial  $\eta^2=0.009$ ) and math interest ( $F(6, 1745)=2.2$ ,  $p<0.05$ ; partial  $\eta^2=0.007$ ), particularly in 9<sup>th</sup> grade ( $p<0.05$ ). Consistent with STEM Interest, females showed lower SSSE scores than males ( $p<0.001$ ) and a significant stepwise relationship was observed between SSSE quartiles and composite STEM domain interest ( $p<0.001$ ) that resulted in a large effect size (partial  $\eta^2=0.152$ ). Specifically, females had lower composite STEM domain interest scores across all SSSE quartiles (partial  $\eta^2=0.005$ ). Females also had lower SSSE scores than

males across the lowest three mindset quartiles, though equivalent scores were observed between genders in the highest mindset quartile ( $F(3,1548)=3.1$ ,  $p<0.05$ ; partial  $\eta^2= 0.004$ ). No interactions were observed for science ( $p=.24$ ), engineering ( $p=.17$ ), technology ( $p=.51$ ), or STEM careers ( $p=.09$ ).

## **Conserved Relationship between Impulsivity, Mindset, SSSE, and Math Interest**

Math interest quartiles were calculated for students (lowest= $\leq 16$ ; 17-21; 22-29; 30+) to permit analyses of self-reported learning behaviors by chi square. Two questions asked students about their procedures when solving math problems, one asked about learning pace, and one asked about behaviors when working in a group setting. A striking pattern emerged across all four questions between high/low quartiles of students, where most impulsive students showed similar responses to students with least mindset, least SSSE, and least math interest (Fig 3).

**Figure 3: Learning behaviors are conserved when comparing highest quartiles of impulsivity with lowest quartiles of mindset, SSSE, and math interest.** Most impulsive students (red lines) reported similar difficulties when solving math problems as students in lowest mindset, SSSE, and math interest quartiles (darker lines,  $*p<0.001$ ).

## **Missing Data Comparisons**

Patterns of missing data were analyzed by instrument completion status, student demographics, and survey time points. A total of 1403 students (56.7%) completed all four Survey 1 scales (impulsivity, mindset, SSSE, and STEM skills), 734 (29.6%) partially completed

scales (i.e., attempted all four scales, but did not fully complete at least one scale), 291 (11.8%) skipping at least one scale in entirety, and 48 students (1.9%) did not respond to any questions on all four scales. Completion status did not differ for students completing Survey 1 versus matched surveys ( $p=.90$ ). Completion status was not affected by gender ( $p=.21$ ), though grade had a significant effect ( $p<0.001$ ) where 6<sup>th</sup> grade students were less likely to complete all scales (37.4%) compared to other grades (59.9-69.6%). Rather than partial completions, 6<sup>th</sup> grade students skipped entire scales (31.6%) compared to older students (2.2%-10.3%), possibly due to lack of time. No differences existed in instrument scores between Survey 1, Survey 2, or matched surveys for any of the instruments except SSSE, which was higher among students with matched surveys ( $M=68.9$ ,  $SD=23.0$ ,  $n=671$ ) compared to Survey 1 alone ( $M=66.6$ ,  $SD=22.4$ ,  $n=1228$ ;  $p<0.05$ ). Students with partial or skipped instruments were grouped for analyses, though only mindset showed a significant difference based on completion status ( $p<0.01$ ), with higher mindset scores among students completing all scales (60.2,  $SD$  7.3,  $n=1403$ ) than partial completions ( $M=59.0$ ,  $SD=7.2$ ,  $n=358$ ). GLM was used to determine if differences existed in scores by completion status and demographics. When examined by completion status, only STEM career interest scores differed, where higher scores were observed among students with partial completions on other scales ( $p<0.05$ ).

## Discussion

The research presented above confirms the positive association and large effect size between science self-efficacy and STEM domain interest demonstrated by others (3, 5, 6). It also confirms a positive association between “growth” mindset and self-beliefs towards STEM (51), which this study expands to include science self-efficacy (large effect size), interest in all STEM domains (small to moderate effect size), interest in a STEM career (small-moderate effect size), and self-beliefs in STEM skills, such as using data and interpreting graphs

(moderate effect size) among students in grades 6-12. Consistent with previous findings showing impulsivity affecting academic performance in the context of ADHD and self-discipline (20, 24, 29), this manuscript reports a negative association of impulsivity on all measures of STEM studied, including sources of science self-efficacy (large effect size), interest in all STEM domains (small to moderate effect size), interest in a STEM career (small-moderate effect size), and STEM skills (moderate effect size). These findings suggest that impulsivity is likely influencing STEM learning outside the context of diagnosed and undiagnosed ADHD, which is estimated to have a prevalence within the U.S. school population of 5.9%-7.1% (30), though up to 11% per parent self-report (52). The data presented here offer that students fall along a continuum of impulsivity scores, with a negative stepwise effect observed for each impulsivity quartile on all STEM outcomes measured across a large, three state sample of adolescents in grades 6-12 (Table 3). Thus, while some students may have diagnosed or undiagnosed ADHD, these data support a larger reach of impulsivity that may negatively impact STEM persistence, possibly by influencing students' self-beliefs in their STEM abilities.

These results are not designed to be causal, but rather offer preliminary support for the combined impact that the degree of impulsivity and growth mindset play as significant behavioral correlates of STEM interest and science self-efficacy (Fig 2C). For example, students in the most impulsive/highest mindset group had identical sources of science self-efficacy (SSSE) scores to students in the least impulsive/lowest mindset group. As impulsivity is thought to be a stable trait, whereas mindset can be grown, these findings suggest that mindset interventions may be beneficial for improving impulsive students' self-efficacy for science. Growth mindset interventions, which emphasize recognition for effort rather than achievement, have been shown to improve learning and achievement (51, 53-55), particularly among groups underrepresented in STEM domains (40, 56-60). This may be particularly important, since currently, no classroom strategies have sufficient evidence for supporting learning gains among ADHD students, even following medication to alleviate symptoms (61,

62). This research suggests potential for mindset interventions, especially for students with highest impulsivity, and with respect to science and math, most notably.

These findings are supported by data describing similar patterns for how most impulsive students solve math problems and engage in learning (Fig 3), which mirror patterns observed for students with least mindset, least science self-efficacy, and least math interest. These cross-sectional findings offer that impulsive students may struggle more when solving math problems or learning difficult material, which may negatively influence self-beliefs in their abilities, consistent with previous reports (3). Impulsive students are not at an academic disadvantage, as their ability to perceive situations differently and learn at a different pace may be an asset in some situations, as early literature supports the notion that impulsivity can have functional or dysfunctional effects (63). For example, Tymms and Merrell (20) offer that blurting out answers may be an overt sign of cognitive engagement, where impulsivity may serve a positive function. Our data show that “when in a study group working on difficult material”, impulsive students were more likely to “sit back and listen” than “jump in and contribute ideas”. While seemingly counterintuitive, this finding may stem from impulsive students’ altered self-beliefs in their abilities when working on material that is challenging. For example, when restricting analyses to only the most impulsive quartile, students who “jump in and contribute ideas” had significantly higher sources of science self-efficacy scores ( $p < 0.02$ ), mastery experience sub-scores ( $p < 0.01$ ), science interest scores ( $p < 0.05$ ), and reported greater self-beliefs in their ability to interpret graphs ( $p < 0.05$ ) than equally impulsive students who reported to “sit back and listen”. No differences were observed for math interest ( $p = 0.07$ ) or mindset ( $p = .13$ ) between these students. Thus, opportunities may exist for supporting impulsive students in STEM as they engage in difficult material or problem-based learning.

Consistent with prior studies documenting a gender gap in STEM (51, 64-66), this study observed females had lower sources of science self-efficacy, which confirm results from Britner and Parajes (67) using the same scale. This effect was not related to impulsivity, as no

difference in impulsivity was observed between gender. However, mindset may play a role, as males had higher sources of science self-efficacy scores than females in the lowest three quartiles of mindset, despite equivalent scores in the highest mindset quartile ('growth mindset'). Thus, targeting females for mindset interventions may be particularly successful if females' self-beliefs toward their STEM abilities are low. Likewise, mindset interventions may also help students who express interest in STEM but lack the background content knowledge in a STEM domain, making the work more challenging, albeit surmountable. When not prepared for academic difficulties, students' self-beliefs in their abilities may be challenged (56, 57) and reduce STEM interest and engagement (3). Finally, consistent with prior findings (68), 9<sup>th</sup> grade students had lower sources of science self-efficacy, interest in STEM domains, interest in a STEM career, and mindset, as well as a slight but significant increase in impulsivity when compared to students in other grades. Given that 9<sup>th</sup> grade is the time when students are told that their grades are first starting to 'count' towards college, students may feel greater stress to succeed academically and may decline STEM electives, particularly if grades are low and/or a student feels behind compared to peers.

Important limitations of this work relate to its lack of causal design as well as caution in interpretations for grades 10-12. While 12<sup>th</sup> grade students also have low sources of science self-efficacy scores, the smaller sample size limits confidence in making interpretations related to effects of gender, mindset, or impulsivity. Instead, efforts focus primarily on middle school grades and have grouped high school grades 9-12 together prior to testing associations. In addition, the cross-sectional design separated surveys across two time points to ease survey fatigue, which resulted in a lower sample size when comparing relationships with STEM domain interest. While significant, greatest confidence can be attributed to relationships between impulsivity, mindset, and sources of science self-efficacy, as these measures were completed within the same survey and were highly reproducible in every school site studied. While a tendency for impulsive students to not complete a questionnaire was expected, this was not the

case, as only mindset scores differed between students who completed all instruments versus students with partially completed or completely skipped instruments. Instead, 6<sup>th</sup> grade students had the greatest amount of skipped instruments, rather than partial completions, likely due to survey length and limited time.

## **Conclusion**

This study offers that impulsivity may affect learning behaviors and self-beliefs regarding STEM across a wider spectrum of adolescents than previously considered. Based on the data, it is hypothesized that STEM persistence and attrition may be attributable to students' underexplored behavioral characteristics (e.g., impulsivity and mindset) that reinforce or impede STEM learning, consistent with government findings (2012) that also identified intellectual engagement, motivation, and identification with STEM pursuits as critical for persistence in STEM majors. These behavioral correlates, with impulsivity in particular, may deserve more consideration among faculty, STEM programs, as well as secondary and postsecondary institutions when supporting struggling students in STEM.

## **Acknowledgements**

The authors would like to thank Berk Moss (1945-2018) for guiding recruitment and retention procedures when working with schools and teachers.

## References

1. Jones BD, Paretto MC, Hein SF, Knott TW. An analysis of motivation constructs with first-year engineering students: Relationships among expectancies, values, achievement, and career plans. *Journal of Engineering Education*. 2010;99:319-36.
2. Lent R, Brown S, Schmidt J, Brenner B, Lyons H, Treistman D. Relation of contextual supports and barriers to choice behavior in engineering majors: Test of alternative social cognitive models *Journal of Counseling Psychology*. 2003;50:58–465.
3. Simpkins SD, Davis-Kean PE, Eccles JS. Math and science motivation: A longitudinal examination of the links between choices and beliefs. *Dev Psychol*. 2006;42(1):70-83.
4. Parsons JS, Adler TF, Meece JL. Sex differences in achievement: A test of alternate theories. *Journal of Personality and Social Psychology*. 1984;46:26-43.
5. Maltese AV, Tai RH. Pipeline persistence: examining the association of educational experiences with earned degrees in STEM among U.S. students. *Science Education*. 2011;95(5):877-907.
6. Tai RH, Qi Liu C, Maltese AV, Fan X. Career choice. Planning early for careers in science. *Science*. 2006;312(5777):1143-4.
7. Graham MJ, Frederick J, Byars-Winston A, Hunter AB, Handelsman J. Science education. Increasing persistence of college students in STEM. *Science*. 2013;341(6153):1455-6.
8. Spinella M, Miley W. Impulsivity and academic achievement in college students. *College Student Journal*. 2003;37(4).
9. Moeller FG, Barratt ES, Dougherty DM, Schmitz JM, Swann AC. Psychiatric aspects of impulsivity. *Am J Psychiatry*. 2001;158(11):1783-93.
10. Evenden J. Impulsivity: a discussion of clinical and experimental findings. *J Psychopharmacol*. 1999;13(2):180-92.
11. Green L, Myerson J. How many impulsivities? A discounting perspective. *J Exp Anal Behav*. 2013;99(1):3-13.
12. Luman M, Tripp G, Scheres A. Identifying the neurobiology of altered reinforcement sensitivity in ADHD: a review and research agenda. *Neurosci Biobehav Rev*. 2010;34(5):744-54.
13. Robbins TW, Gillan CM, Smith DG, de Wit S, Ersche KD. Neurocognitive endophenotypes of impulsivity and compulsivity: towards dimensional psychiatry. *Trends Cogn Sci*. 2012;16(1):81-91.
14. Mitchell SH, de Wit H. Impulsivity. In: Stolerman I, editor. *Encyclopedia of Psychopharmacology*. 2nd ed. Heidelberg, Germany: Springer-Verlag; 2015.
15. Weafer J, Mitchell SH, de Wit H. Recent Translational Findings on Impulsivity in Relation to Drug Abuse. *Curr Addict Rep*. 2014;1(4):289-300.
16. White JL, Moffitt TE, Caspi A, Bartusch DJ, Needles DJ, Stouthamer-Loeber M. Measuring impulsivity and examining its relationship to delinquency. *J Abnorm Psychol*. 1994;103(2):192-205.
17. Dalley JW, Everitt BJ, Robbins TW. Impulsivity, compulsivity, and top-down cognitive control. *Neuron*. 2011;69(4):680-94.
18. Fineberg NA, Potenza MN, Chamberlain SR, Berlin HA, Menzies L, Bechara A, et al. Probing compulsive and impulsive behaviors, from animal models to endophenotypes: a narrative review. *Neuropsychopharmacology*. 2010;35(3):591-604.
19. Nugent K, Smart W. Attention-deficit/hyperactivity disorder in postsecondary students. *Neuropsychiatr Dis Treat*. 2014;10:1781-91.



20. Tymms P, Merrell C. ADHD and academic attainment: Is there an advantage in impulsivity? *Learning and individual differences*. 2011;21:753-8.
21. Kerr B, Kurpius S. Encouraging talented girls in math and science: effects of a guidance intervention *High Ability Studies*. 2004;15(1):2004.
22. Ghahremani DG, Oh EY, Dean AC, Mouzakis K, Wilson KD, London ED. Effects of the Youth Empowerment Seminar on impulsive behavior in adolescents. *Journal of Adolescent Health*. 2013;53(1):139-41.
23. Wentzel KR, Weinberger DA, Ford ME, Feldman SS. Academic achievement in preadolescence: The role of motivational, affective, and self-regulatory processes. *Journal of Applied Developmental Psychology*. 1990;11:179-93.
24. Duckworth AL, Seligman ME. Self-discipline outdoes IQ in predicting academic performance of adolescents. *Psychological Science*. 2005;16(12):939-44.
25. Vigil-Colet A, Morales-Vives F. How impulsivity is related to intelligence and academic achievement. *Span J Psychol*. 2005;8(2):199-204.
26. Williams J, Dayan P. Dopamine, learning, and impulsivity: a biological account of attention-deficit/hyperactivity disorder. *J Child Adolesc Psychopharmacol*. 2005;15(2):160-79; discussion 57-9.
27. Frazier TW, Youngstrom EA, Glutting JJ, Watkins MW. ADHD and achievement: meta-analysis of the child, adolescent, and adult literatures and a concomitant study with college students. *Journal of Learning Disabilities*. 2007;40(1):49-65.
28. McGee R, Prior M, Williams S, Smart D, Sanson A. The long-term significance of teacher-rated hyperactivity and reading ability in childhood: findings from two longitudinal studies. *J Child Psychol Psychiatry*. 2002;43(8):1004-17.
29. Merrell C, Tymms PB. Inattention, hyperactivity and impulsiveness: their impact on academic achievement and progress. *Br J Educ Psychol*. 2001;71(Pt 1):43-56.
30. Willcutt EG. The prevalence of DSM-IV attention-deficit/hyperactivity disorder: a meta-analytic review. *Neurotherapeutics*. 2012;9(3):490-9.
31. Pullen PC. Prevalence of LD from parental and professional perspectives: A comparison of the data from the National Survey of Children's Health and the Office of Special Education Programs' Reports to Congress. *Journal of Learning Disabilities*. 2016.
32. CDC. Prevalence of autism spectrum disorder among children aged 8 years - autism and developmental disabilities monitoring network, 11 sites, United States, 2010. *MMWR Surveill Summ*. 2014;63(2):1-21.
33. Dweck C. *Self-theories: Their role in motivation, personality, and development* Philadelphia: Psychology Press; 1999. 212 p.
34. Dweck C. *Mindset: The new psychology of success*. New York: Random House; 2006.
35. National Center for Education Statistics: Search for Schools and Colleges [Internet]. U.S. Department of Education Institute of Education Sciences. 2015.
36. Spinella M. Normative data and a short form of the Barratt Impulsiveness Scale. *Int J Neurosci*. 2007;117(3):359-68.
37. Patton JH, Stanford MS, Barratt ES. Factor structure of the Barratt impulsiveness scale. *J Clin Psychol*. 1995;51(6):768-74.
38. Usher EL, Parajes F. Sources of self-efficacy in mathematics: A validation study. *Contemporary Educational Psychology*. 2009;34:89-101.
39. Chen JA, Usher EL. Profiles of the sources of science self-efficacy. *Learning and Individual Differences*. 2013;24:11-21.
40. Blackwell L, Trzesniewski K, Dweck C. Implicit Theories of Intelligence Predict Achievement Across an Adolescent Transition: A Longitudinal Study and an Intervention Child Development. 2007;78(1):246-63.

41. Midgley C, Maehr ML, Huda L, Anderman E, Anderman L, Freeman K, et al. Manual for the Patterns of Adaptive Learning Scales. In: Michigan Uo, editor. Ann Arbor, MI: <http://www.umich.edu/~pals/manuals.html>; 2000.
42. Knezek G, Christensen R, Tyler-Wood T. Contrasting perceptions of STEM content and careers. *Contemporary Issues in Technology and Teacher Education*. 2011;11(1):92-117.
43. Tyler-Wood T, Knezek G, Christensen R. Instruments for Assessing Interest in STEM Content and Careers *Journal of Technology and Teacher Education*. 2010;18(2):341-63.
44. Felder RM, Spurlin J. Applications, reliability, and validity of the Index of Learning Styles. *International Journal of Engineering Education*. 2005;21(1):103-12.
45. Jamieson S. Likert scales: how to (ab)use them. *Med Educ*. 2004;38(12):1217-8.
46. Norman G. Likert scales, levels of measurement and the "laws" of statistics. *Adv Health Sci Educ Theory Pract*. 2010;15(5):625-32.
47. Lakens D. Calculating and reporting effect sizes to facilitate cumulative science: a practical primer for t-tests and ANOVAs. *Front Psychol*. 2013;4:863.
48. Cohen J. *Statistical power analysis for the behavioral sciences* (rev. ed.). Hillsdale, NJ: Lawrence Erlbaum Associates, Inc.; 1988.
49. Wuensch K. Karl Wuensch's Statistical Help Page: Placing a confidence interval on multiple Rsquared Greenville, North Carolina: East Carolina University; 2016 [Available from: <http://core.ecu.edu/psyc/wuenschk/StatHelp/CI-R2.htm>].
50. NIH. Frequently Asked Questions: Recruitment and Retention Plan to Enhance Diversity Washington DC: National Institutes of Health; 2009 [Available from: [http://grants.nih.gov/TRAINING/FAQ\\_DIVERSITY.HTM#867](http://grants.nih.gov/TRAINING/FAQ_DIVERSITY.HTM#867)].
51. Nix S, Perez-Felkner L, Thomas K. Perceived mathematical ability under challenge: a longitudinal perspective on sex segregation among STEM degree fields. *Front Psychol*. 2015;6:530.
52. Visser SN, Danielson ML, Bitsko RH, Holbrook JR, Kogan MD, Ghandour RM, et al. Trends in the parent-report of health care provider-diagnosed and medicated attention-deficit/hyperactivity disorder: United States, 2003-2011. *J Am Acad Child Adolesc Psychiatry*. 2014;53(1):34-46.e2.
53. Good C, Rattan A, Dweck CS. Why do women opt out? Sense of belonging and women's representation in mathematics. *Journal of Personality and Social Psychology*. 2012;102:700-17.
54. Yeager D, Dweck C. Mindsets that promote resilience: when students believe that personal characteristics can be developed. *Educational Psychologist*. 2012;47(4):302-14.
55. Yeager DS, Johnson R, Spitzer BJ, Trzesniewski KH, Powers J, Dweck CS. The far-reaching effects of believing people can change: implicit theories of personality shape stress, health, and achievement during adolescence. *J Pers Soc Psychol*. 2014;106(6):867-84.
56. Halperin E, Crisp RJ, Husnu S, Trzesniewski KH, Dweck CS, Gross JJ. Promoting intergroup contact by changing beliefs: group malleability, intergroup anxiety, and contact motivation. *Emotion*. 2012;12(6):1192-5.
57. Mangels JA, Good C, Whiteman RC, Miscalco B, Dweck CS. Emotion blocks the path to learning under stereotype threat. *Soc Cogn Affect Neurosci*. 2012;7(2):230-41.
58. Rattan A, Savani K, Naidu NV, Dweck CS. Can everyone become highly intelligent? Cultural differences in and societal consequences of beliefs about the universal potential for intelligence. *J Pers Soc Psychol*. 2012;103(5):787-803.
59. Aronson J, Fried C, Good C. Reducing the effects of stereotype threat on African American college students by shaping theories of intelligence. *Journal of Experimental Social Psychology*. 2012;38:113-25.
60. Paunesku D, Walton GM, Romero C, Smith EN, Yeager DS, Dweck CS. Mind-set interventions are a scalable treatment for academic underachievement. *Psychological Science*. 2015:784-93.

61. Taylor E, Kendall T, Asherson P, Bailey S, Bretherton K, Brown A, et al. Attention Deficit Hyperactivity Disorder: The NICE guideline on diagnosis and management of ADHD in children, young people, and adults: national clinical practice guideline number 72. London: The British Psychological Society and the Royal College of Psychiatrists; 2009.
62. Chan E, Fogler JM, Hammerness PG. Treatment of Attention-Deficit/Hyperactivity Disorder in Adolescents: A Systematic Review. *JAMA*. 2016;315(18):1997-2008.
63. Dickman SJ. Functional and dysfunctional impulsivity: Personality and cognitive correlates. *Journal of Personality & Social Psychology*. 1990;58(1):95-102.
64. Jackson D, Starobin S, Laanan F. The Shared Experiences: Facilitating Successful Transfer of Women and Underrepresented Minorities in STEM Fields. *New Directions for Higher Education*. 2013;162:69-72.
65. Reyes M. Unique Challenges for Women of Color in STEM Transferring from Community Colleges to Universities. *Harvard Educational Review*. 2011;81(2):241-62.
66. NSF. Women, Minorities, and Persons with Disabilities in Science and Engineering Washington D.C.: National Science Foundation; 2015.
67. Britner S, Parajes F. Sources of science self-efficacy beliefs of middle school students *J Res Sci Teach*. 2006;43:485-99.
68. Alspaugh JW. Achievement loss associated with the transition to middle school and high school. *The Journal of Educational Research*. 1998;92(1):20-5.

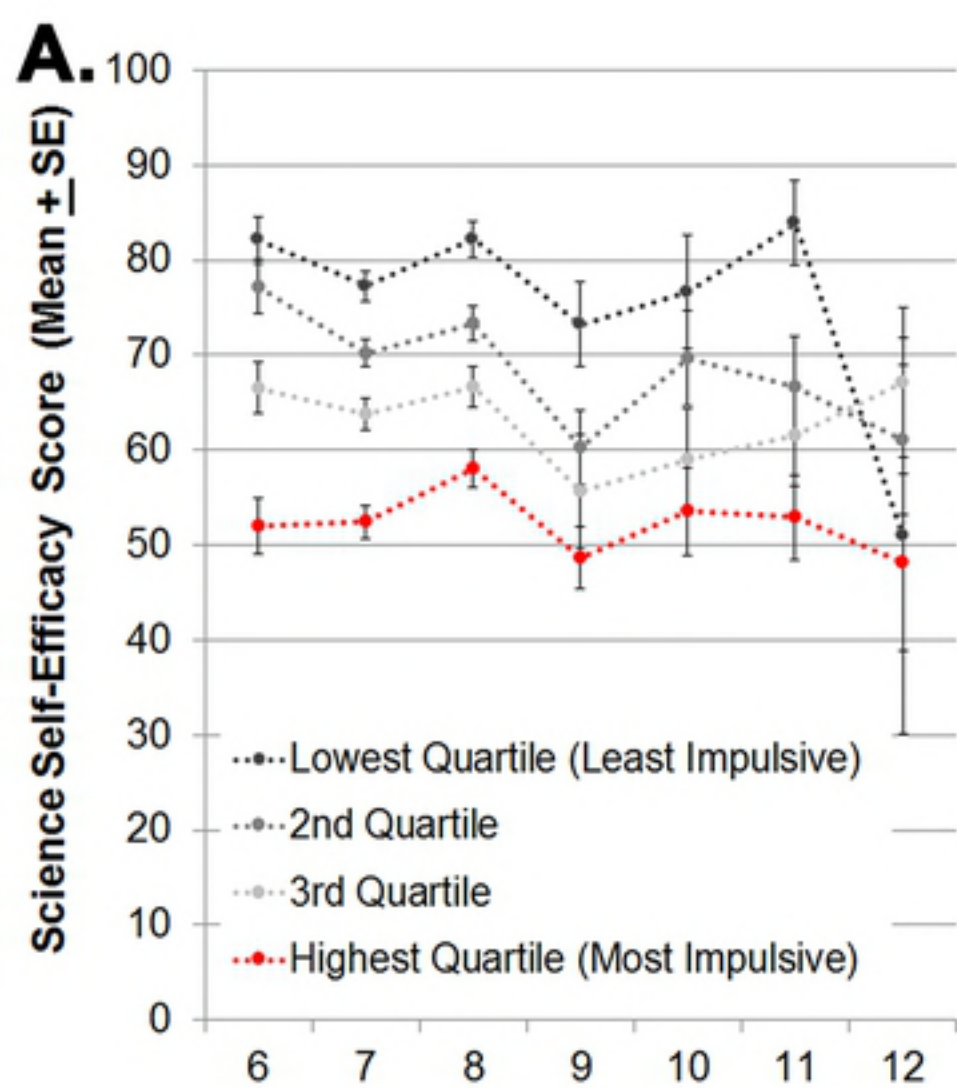

bioRxiv preprint doi: <https://doi.org/10.1101/377994>; this version posted July 26, 2018. The copyright holder for this preprint (which was not certified by peer review) is the author/funder, who has granted bioRxiv a license to display the preprint in perpetuity. It is made available under aCC-BY 4.0 International license.

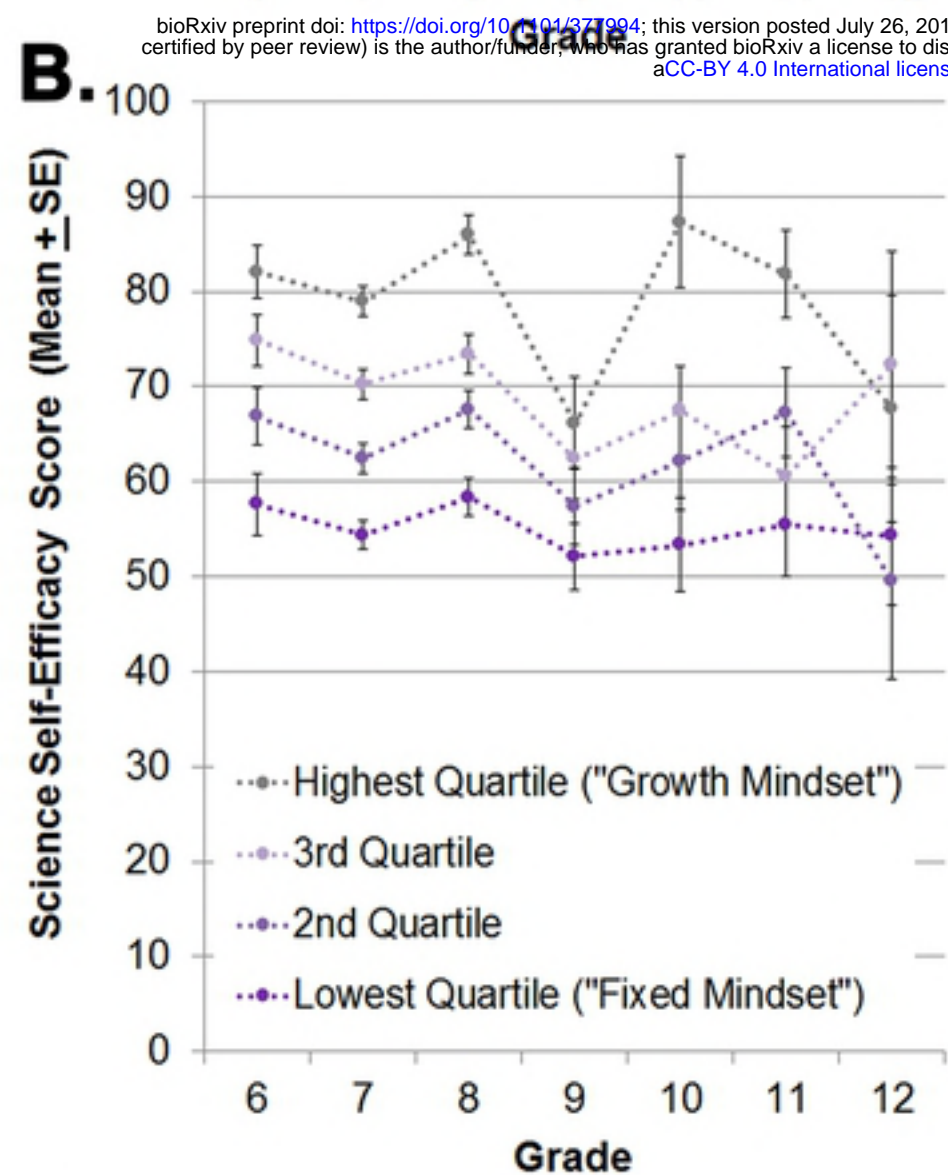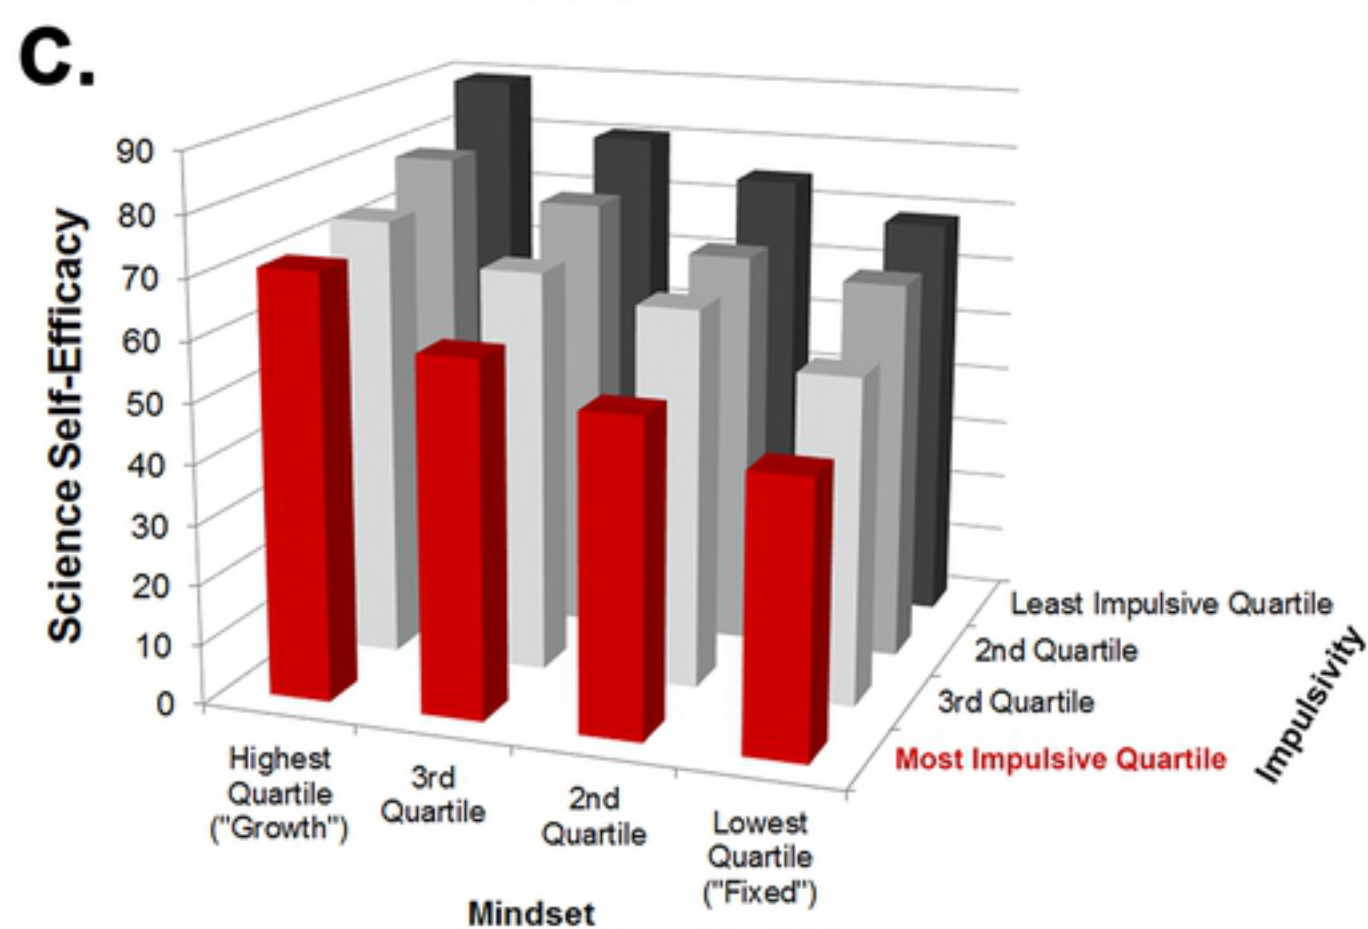



**3242 students enrolled at participating schools (NCES Data, 2013-2014)**

**758 Excluded, did not participate in pre-survey**

**2476 students completed the pre-survey across 6 schools**

**1899 (76.7%) completed Science Self-Efficacy (24 items across 4 domains; Individual Ns of each of the four domains: ME=2210, VE=2145, P=2086, PH=2088)**

**1759 (71.0%) completed Mindset (20 items)**

**2080 (84.0%) completed Impulsivity (15 items across 3 domains; Domain Ns: M=2282, A=2289, NP=2273)**

**2405 (97.1%) completed STEM Skills (4 items)**

**N=1403 (56.7%) completed all four scales**

**Post-surveys sent to schools, all students invited to participate regardless of participation status from pre-survey**

**1119 Excluded, did not participate in post-survey**

**2115 students completed the post-survey across 6 schools**

**1575 (74.5%) completed global STEM Interest (25 items across 5 domains; Individual Ns of each of the five domains: S=1807, T=1784, E=1755, M=1812, C=1785)**

**1840 (87.0%) completed targeted Learning Behaviors (4 items); 1392 (65.8%) completed all 44 items**

**N=1440 (68.1%) completed both scales**

**N=875 (41.5%) linked with pre-survey responses**

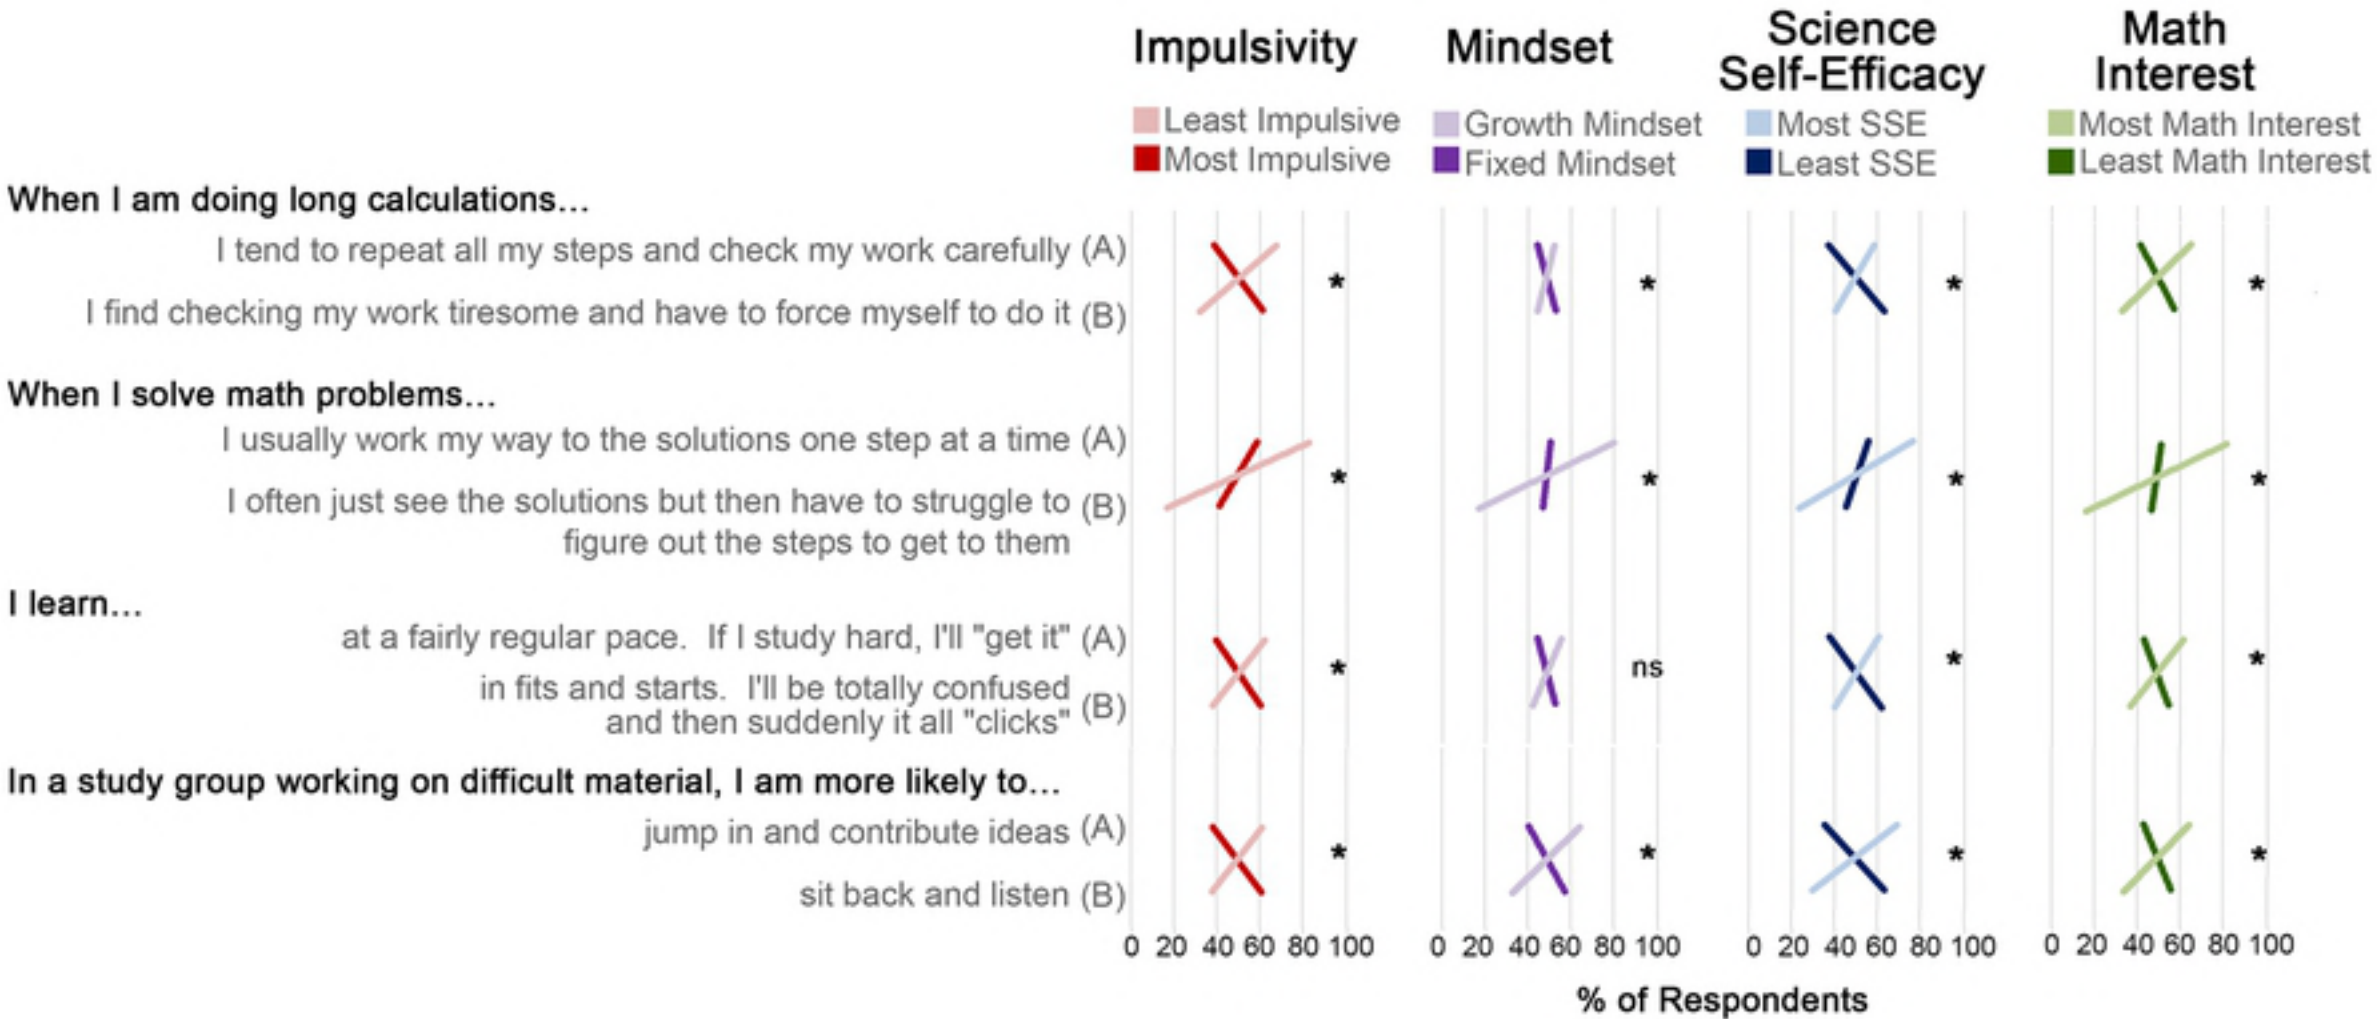

Source: https://www.biorxiv.org/content/10.1101/377994v1.full.pdf
